# Supplementary material for: Thermoelectric Array Sensors with Selective Combustion Catalysts for Breath Gas Monitoring
Source: MDPI journal article supplement (doi:10.3390/s18051579), 2018-05-16
Supplement: s1 [file s1]

Supplementary

# Thermoelectric Array Sensors with Selective Combustion Catalysts for Breath Gas Monitoring

Woosuck Shin <sup>1,\*</sup>, Tomoyo Goto <sup>2</sup>, Daisuke Nagai <sup>1</sup>, Toshio Itoh <sup>1</sup>, Akihiro Tsuruta <sup>1</sup>, Takafumi Akamatsu <sup>1</sup> and Kazuo Sato <sup>3</sup>

Supplementary

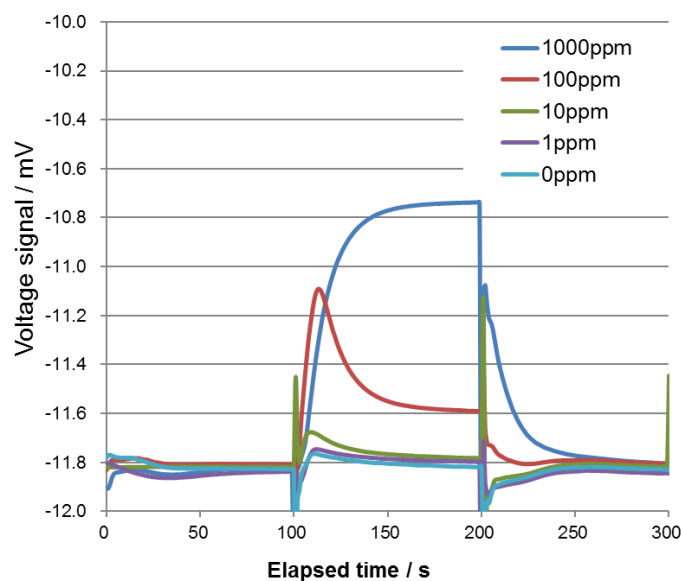

**Figure S1.** Gas response curves of the TAS with Pd/Al<sub>2</sub>O<sub>3</sub> catalysts for the various concentration of CH<sub>4</sub> in air. The change of  $\Delta V$  from the device, or output voltage signal,  $V$ , of TAS for different gas concentrations with respect to time. At elapsed time 100s, the air flow switched to the gas mixture flow, and switched back to air at 200s.

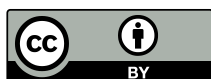

© 2016 by the authors. Submitted for possible open access publication under the terms and conditions of the Creative Commons Attribution (CC-BY) license (<http://creativecommons.org/licenses/by/4.0/>).
